# Supplementary material
Source: Springer Nature journal article supplement (https://www.springerprofessional.de/resource/supplementary/13638_2011_112_MOESM1_ESM.pdf/11897068)

Centralized

Distributed

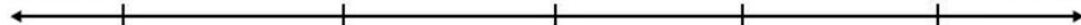

Centralized CA

Replicated CCA

Replicated PDCA

PDCA

FDCA

Supplement: MOESM1 [file 11897068]
